# Supplementary material for: TDP1-independent pathways in the process and repair of TOP1-induced DNA damage
Source: PubMed Central journal article supplement (PMC9307636; doi:10.1038/s41467-022-31801-7), 2022-07-22
Supplement: 41467_2022_31801_MOESM1_ESM.pdf [file 41467_2022_31801_MOESM1_ESM.pdf]

## Supplementary Information

### **TDP1-independent pathways in the process and repair of TOP1-induced DNA damage**

Huimin Zhang<sup>1#</sup>, Yun Xiong<sup>1#</sup>, Dan Su<sup>1</sup>, Chao Wang<sup>1</sup>, Mrinal Srivastava<sup>1</sup>, Mengfan Tang<sup>1</sup>, Xu Feng<sup>1</sup>, Min Huang<sup>1</sup>, Zhen Chen<sup>1</sup>, Junjie Chen<sup>1\*</sup>

#### **Affiliations**

<sup>1</sup>Department of Experimental Radiation Oncology, The University of Texas MD Anderson Cancer Center, Houston, TX 77030, USA

#These authors contributed equally: Huimin Zhang, Yun Xiong.

\*Lead contact and corresponding author. Please address correspondence to

[jchen8@mdanderson.org](mailto:jchen8@mdanderson.org)

**Supplementary Fig. 1**

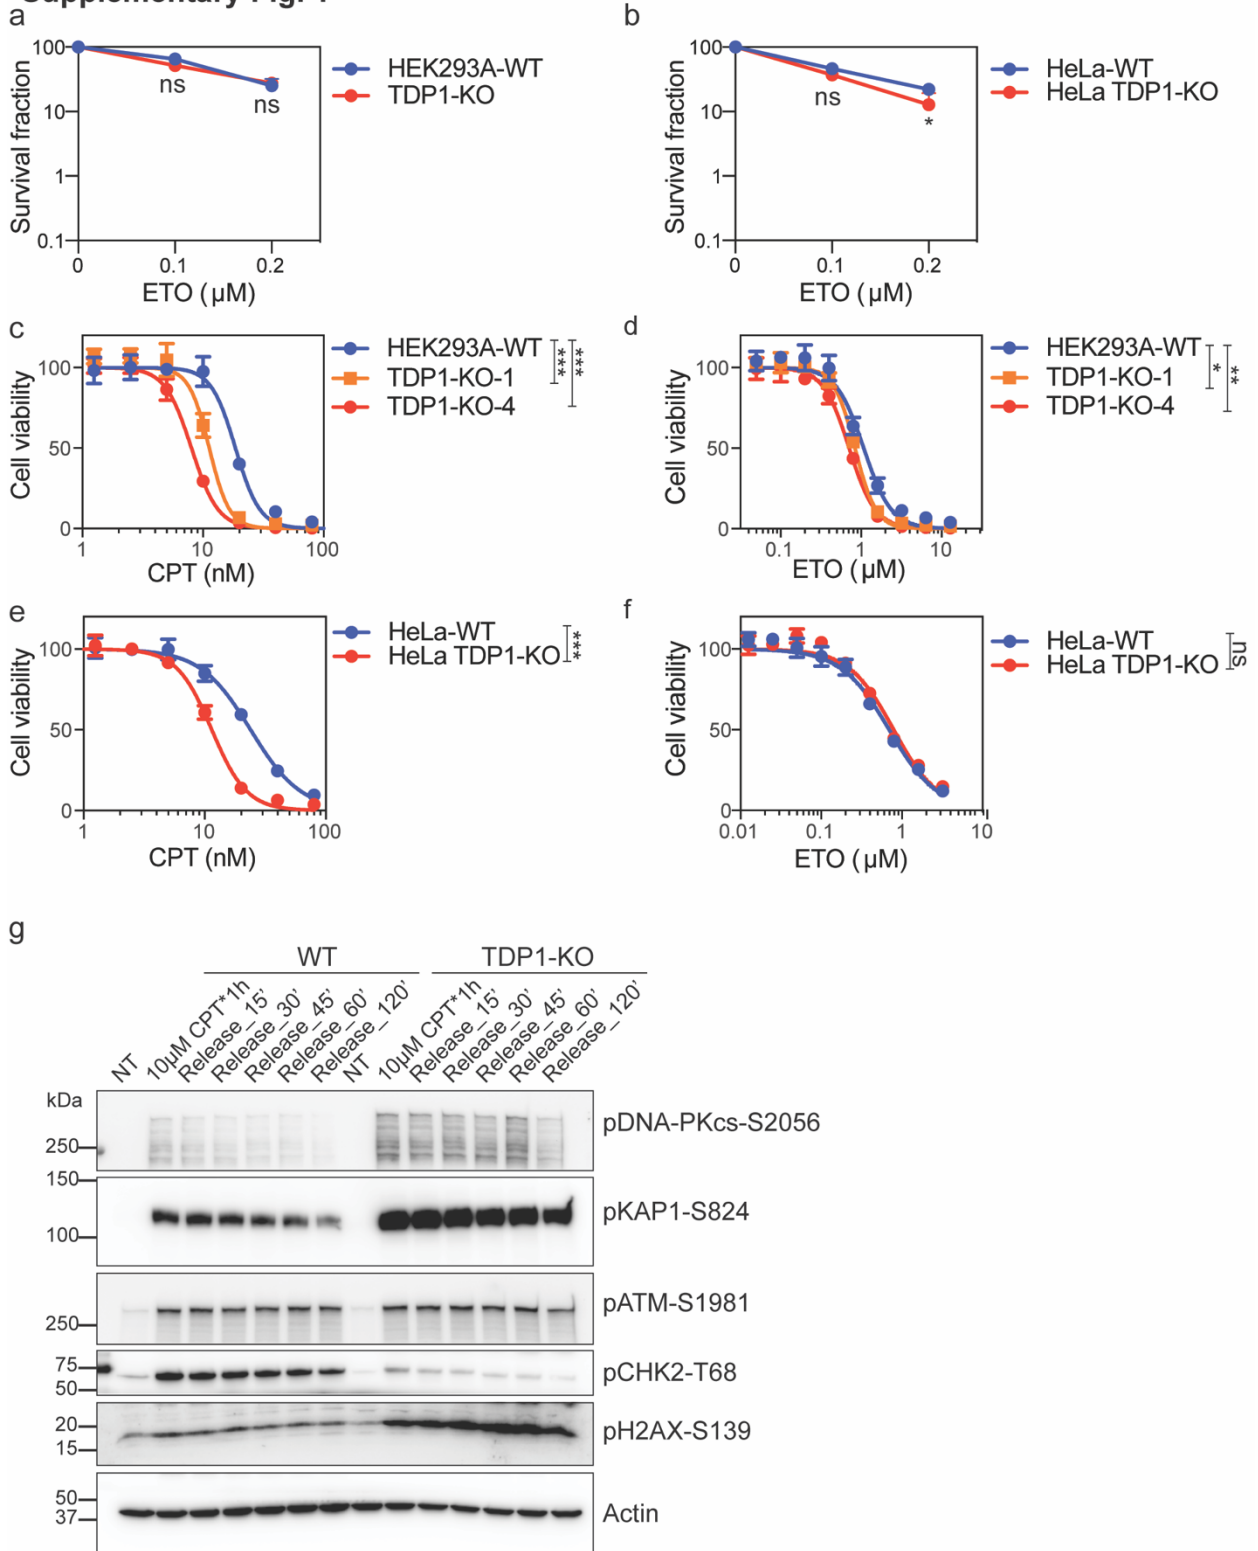

**Supplementary Fig. 1: TDP1-KO cells showed cellular sensitivity to TOP1 poison camptothecin (CPT).** **a** Colony formation assay of HEK293A-WT and TDP1-KO cells with ETO treatment. Data are represented as mean  $\pm$  SD. n=6 biologically independent replicates. Two-tailed unpaired *t* test with Welch's correction was used for statistical analysis. ns, not significant. **b** Colony formation assay of HeLa-WT and HeLa TDP1-KO cells with ETO treatment. Data are represented as mean  $\pm$  SD. n = 6 biologically independent replicates. Two-tailed unpaired *t* test with Welch's correction was used for statistical analysis. \**p* = 0.0179, and ns, not significant. **c** The proliferation of HEK293A-WT, TDP1-KO-1, and TDP1-KO-4 cells was measured using a CellTiter-Glo assay after 3 days in the presence of the indicated concentrations of CPT. Data are presented as the mean  $\pm$  SD (n = 3 biologically independent replicates). Two-tailed unpaired *t*-test was used for statistical analysis of the IC50 of each cell line. \*\*\**p* (HEK293A-WT vs. TDP1-KO-1) = 0.00029, and \*\*\**p* (HEK293A-WT vs. TDP1-KO-4) = 0.00029. **d** as in **c** but treated with different concentrations of ETO. Data are presented as the mean  $\pm$  SD (n = 3 biologically independent replicates). Two-tailed unpaired *t*-test was used for statistical analysis. \**p* (HEK293A-WT vs. TDP1-KO-1) = 0.01418, and \*\**p* (HEK293A-WT vs. TDP1-KO-4) = 0.00363. **e** as in **c** but the proliferation of HeLa and HeLa TDP1-KO cells was measured. Data are presented as the mean  $\pm$  SD (n = 3 biologically independent replicates). Two-tailed unpaired *t*-test was used for statistical analysis. \*\*\**p* = 0.00031. **f** as in **c** but the proliferation of HeLa and HeLa TDP1-KO cells with ETO treatment was measured. Data are presented as the mean  $\pm$  SD (n = 3 biologically independent replicates). Two-tailed unpaired *t*-test was used for statistical analysis. ns, not significant. **g** WT and TDP1-KO cells were treated with 10  $\mu$ M CPT for 1 h and then

released into fresh medium and cultured for the indicated times. Whole-cell extracts were prepared and subjected to Western blotting with the indicated antibodies.

Experiments were repeated at least three times, and similar results were obtained.

**Supplementary Fig. 2**

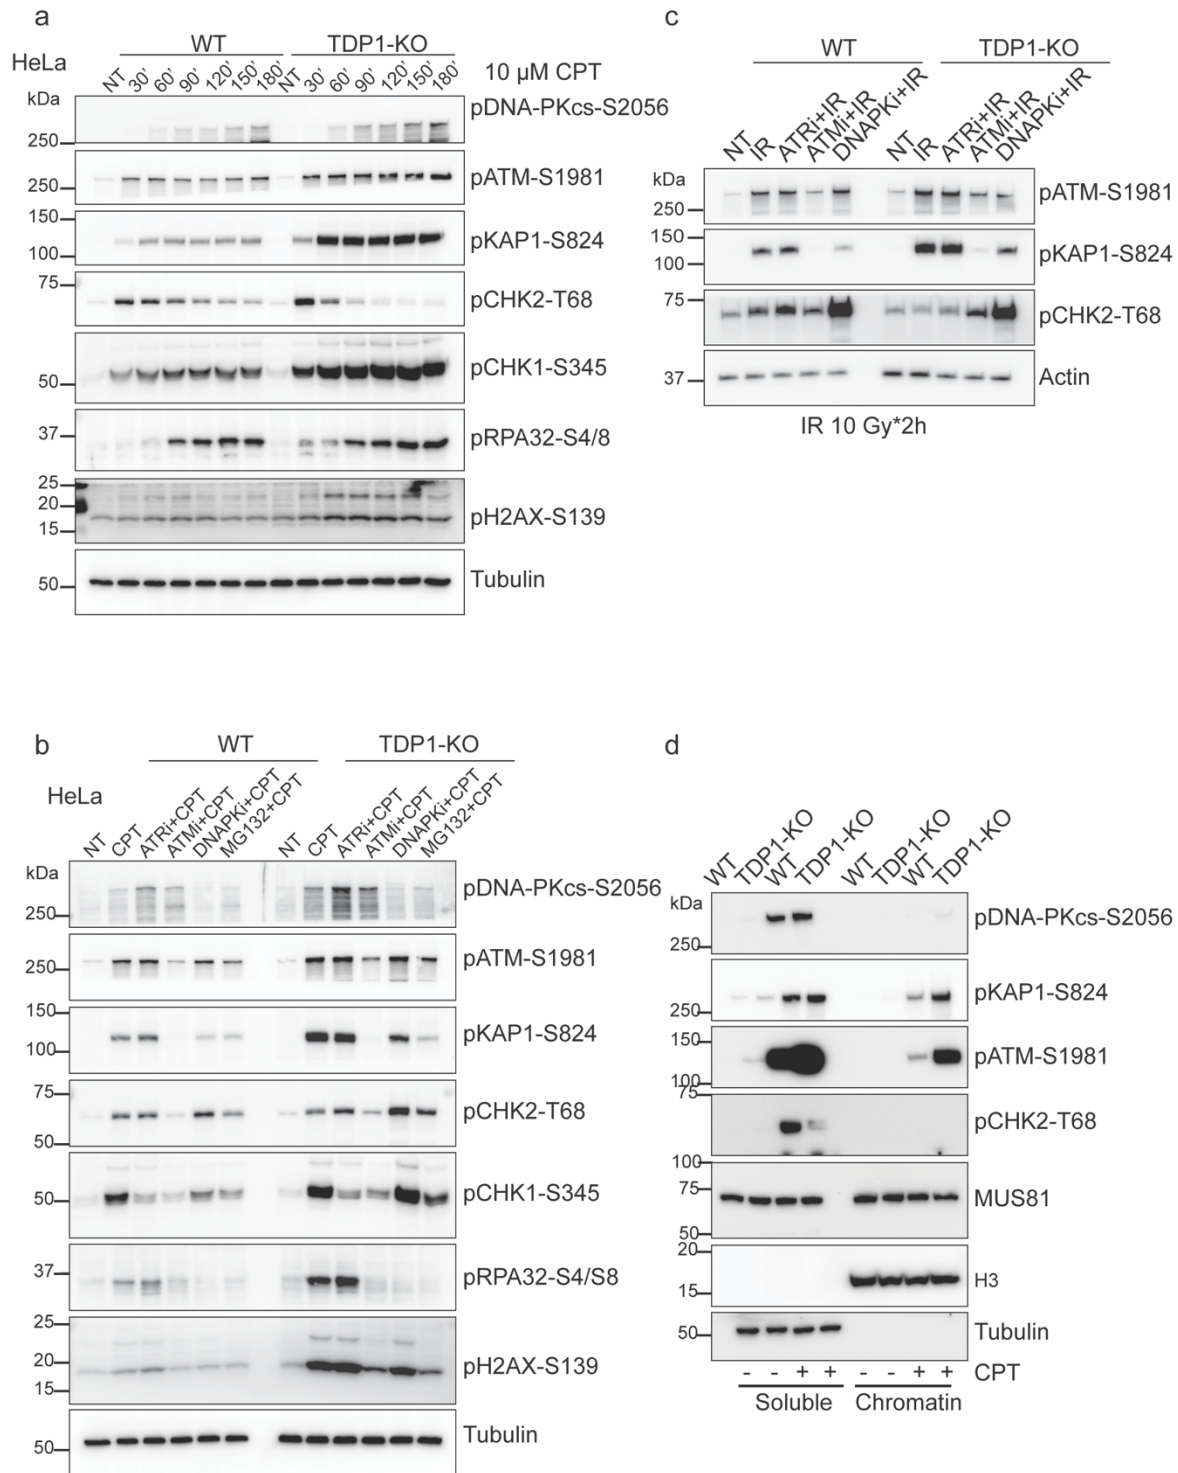

**Supplementary Fig. 2: TDP1-KO cells show increased DSB-induced DNA damage**

**response after treatment with TOP1 poison in HeLa cells. a** HeLa WT and HeLa

TDP1-KO cells were treated with 10  $\mu$ M CPT for the indicated times. Whole-cell extracts were prepared and subjected to Western blotting with the indicated antibodies.

Experiments were repeated at least three times, and similar results were obtained. **b**

HeLa WT and HeLa TDP1-KO cells were pre-treated with 10  $\mu$ M ATRi (AZD6738), 1  $\mu$ M ATMi (AZD0156), 10  $\mu$ M DNA-PKi (AZD7648), or 10  $\mu$ M MG132 for 1 h and then

treated with 10  $\mu$ M CPT for 1 h. Whole-cell extracts were prepared and subjected to

Western blotting with the indicated antibodies. Experiments were repeated at least three

times, and similar results were obtained. **c** WT and TDP1-KO cells were pre-treated

with 10  $\mu$ M ATRi (AZD6738), 10  $\mu$ M ATMi (KU55933), or 10  $\mu$ M DNA-PKi (AZD7648)

and subjected to 10 Gy IR and then released for 2 h. Whole-cell extracts were prepared

and subjected to Western blotting with the indicated antibodies. Experiments were

repeated at least three times, and similar results were obtained. **d** WT and TDP1-KO

cells were untreated (NT) or treated with 10  $\mu$ M CPT for 1 h. The soluble fraction and

chromatin fraction were separated and subjected to Western blotting with the indicated

antibodies. Experiments were repeated at least three times, and similar results were

obtained.

**Supplementary Fig. 3**

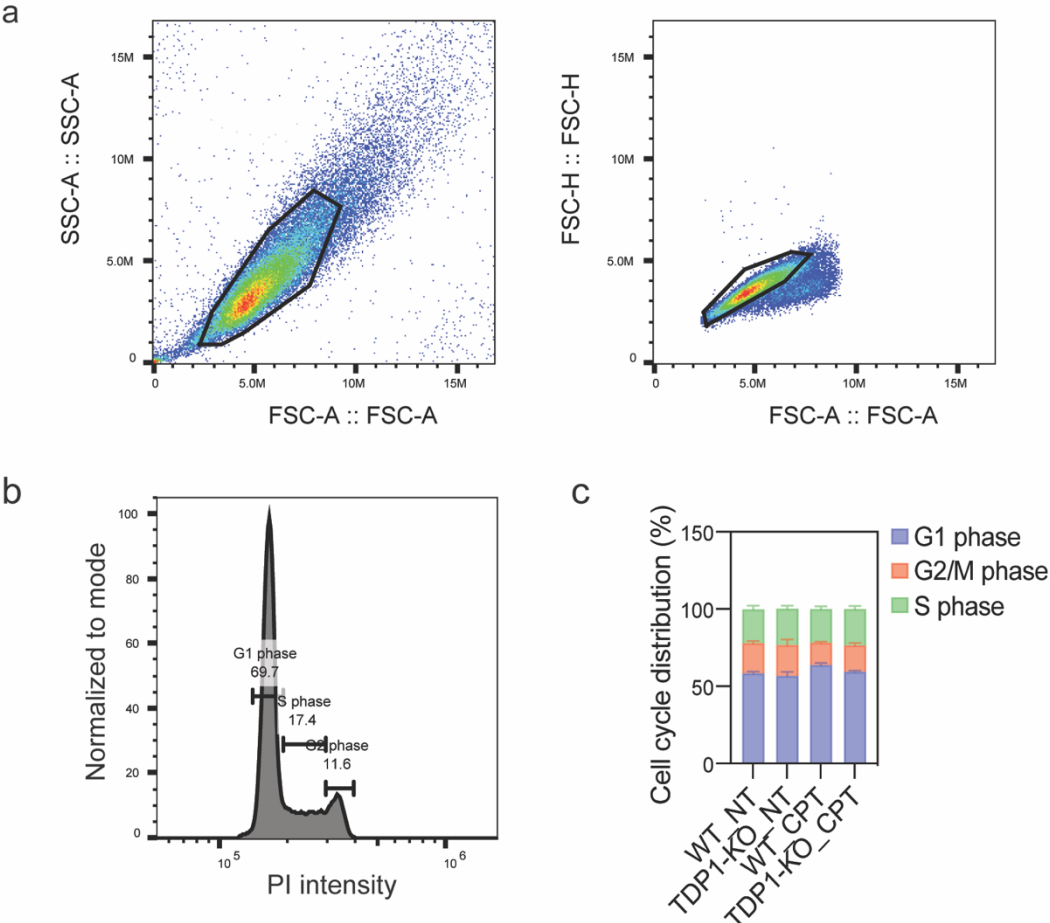

**Supplementary Fig. 3: Example of flow cytometry gating strategy.** **a** Example of flow cytometry gating strategy for single cells. **b** Example of flow cytometry gating strategy for G1, S, and G2/M phases. **c** Cell cycle distribution of the flow cytometry analysis of WT and TDP1-KO cells either not treated (NT) or treated with 10  $\mu$ M CPT for 1 h. Data are presented as the mean  $\pm$  SD (n = 3 biologically independent experiments).

## Supplementary Fig. 4

a

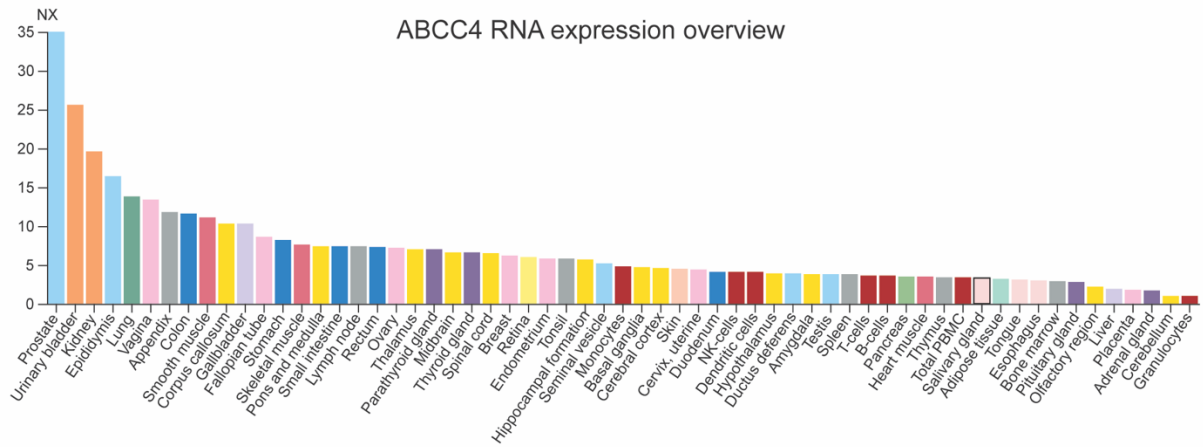

b

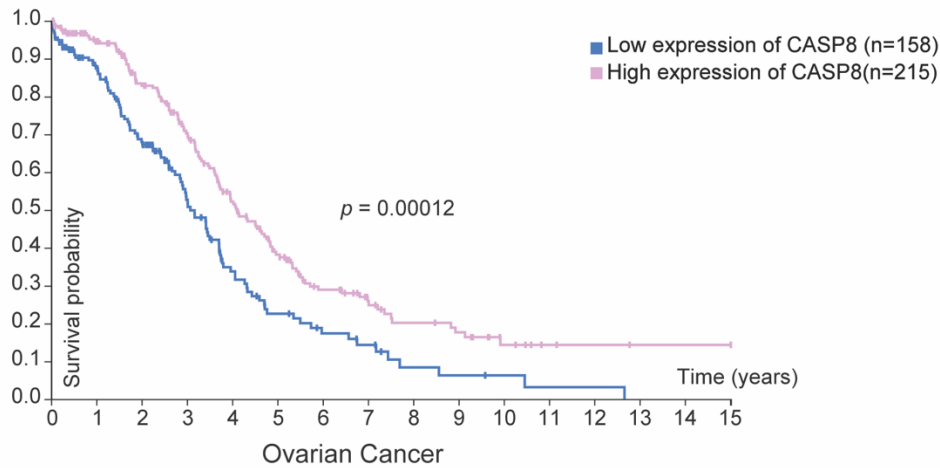

c

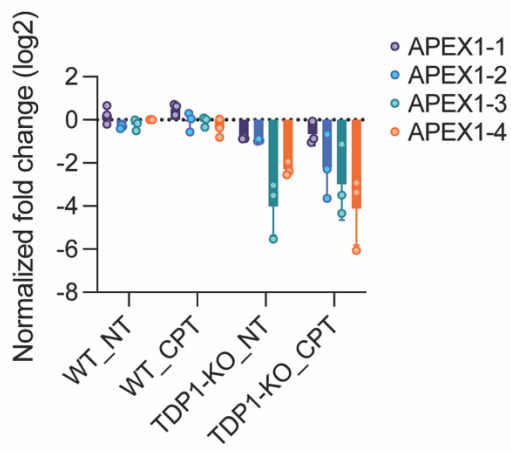

d

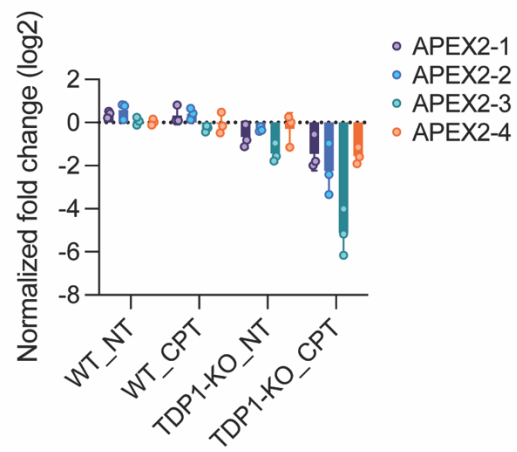



**Supplementary Fig. 4: Genome-wide CRISPR/Cas9 screens in wild-type and TDP1-KO cells with TOP1 poison.** **a** ABCC4 RNA expression overview. Data were obtained from The Human Protein Atlas database (<https://www.proteinatlas.org/>). **b** Kaplan-Meier plots for ovarian cancer, in which high expression of CASP8 is significantly associated with survival ( $p = 0.00012$ ). Data were obtained from The Human Protein Atlas database (<https://www.proteinatlas.org/>).  $p$  score is the log rank  $p$  value for Kaplan-Meier plot showing results from analysis of correlation between mRNA expression level and patient survival. **c** Normalized fold-changes of sgRNA reads for APEX1 in WT\_NT, WT\_CPT, TDP1-KO\_NT, and TDP1-KO\_CPT groups. Data are presented as the mean  $\pm$  SD ( $n = 3$  biologically independent experiments). **d** Normalized fold-changes of sgRNA reads for APEX2 in WT\_NT, WT\_CPT, TDP1-KO\_NT, and TDP1-KO\_CPT groups. Data are presented as the mean  $\pm$  SD ( $n = 3$  biologically independent experiments).

### Supplementary Fig. 5

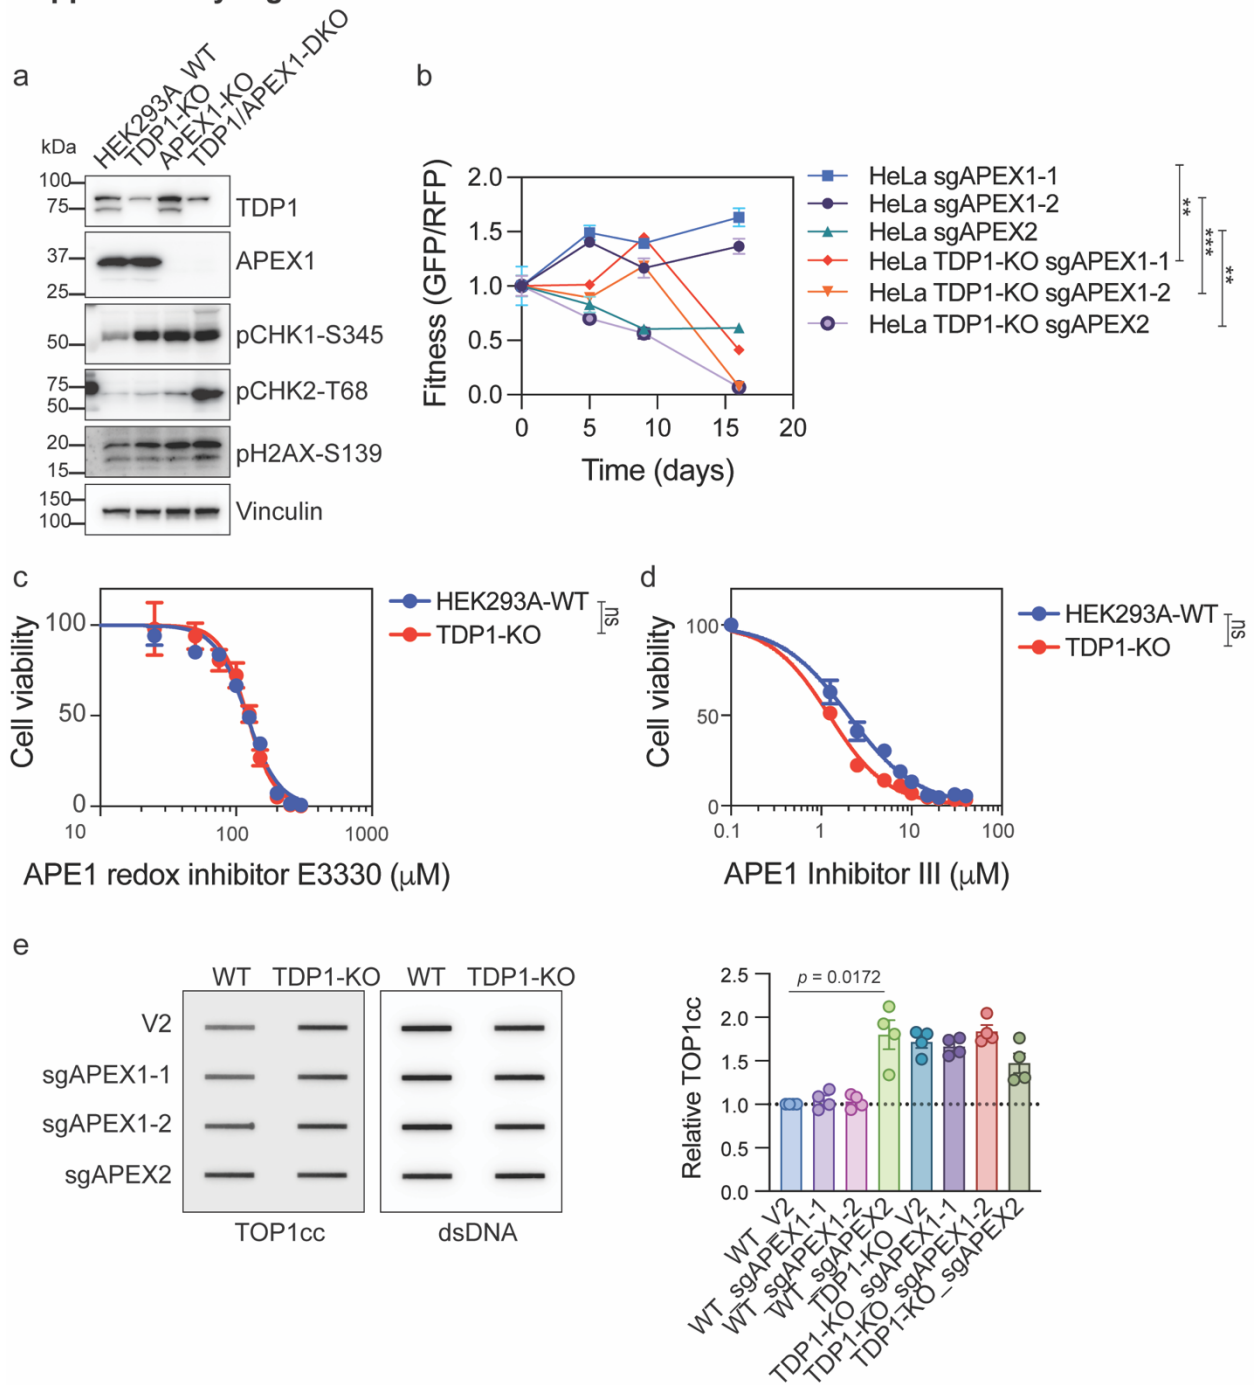

**Supplementary Fig. 5: APEX1 and APEX2 are synthetic lethal with TDP1.** **a** DNA damage checkpoint signaling was detected in HEK293A-WT, TDP1-KO, APEX1-KO, and TDP1/APEX1-DKO cells. Whole-cell extracts were prepared and subjected to Western blotting with the indicated antibodies. Experiments were repeated at least three times, and similar results were obtained. **b** Competitive growth assays in HeLa WT and HeLa TDP1-KO cells infected with a virus expressing the indicated sgRNAs. Data are presented as mean  $\pm$  SD ( $n = 3$  biologically independent experiments). Two-tailed unpaired  $t$  test with Welch's correction was used for statistical analysis.  $**p$  (HeLa sgAPEX1-1 vs. HeLa TDP1-KO sgAPEX1-1) = 0.001301,  $***p$  (HeLa sgAPEX1-2 vs. HeLa TDP1-KO sgAPEX1-2) = 0.000939, and  $**p$  (HeLa sgAPEX2 vs. HeLa TDP1-KO sgAPEX2) = 0.001705. **c, d** Proliferation of HEK293A-WT and TDP1-KO cells was measured using a CellTiter-Glo assay after 3 days in the presence of the indicated concentrations of APEX1 redox inhibitor E3330 (**c**) or APEX1 inhibitor III (**d**). Data are presented as the mean  $\pm$  SD ( $n = 3$  biologically independent experiments). A two-tailed unpaired  $t$ -test was used for statistical analysis of the IC<sub>50</sub> of each cell line. ns, not significant. **e** WT and TDP1-KO cells were infected with pLenti-V2 empty vector or pLenti-V2-sgRNAs targeting APEX1 or APEX2. A RADAR assay was used to assess TOP1cc accumulation after cells were treated with 10  $\mu$ M CPT for 1 h. Double-stranded DNA (dsDNA) was used as a loading control. Data are represented as mean  $\pm$  SEM ( $n = 4$  biologically independent experiments). Two-tailed unpaired  $t$  test with Welch's correction was used for statistical analysis.

**Supplementary Fig. 6**

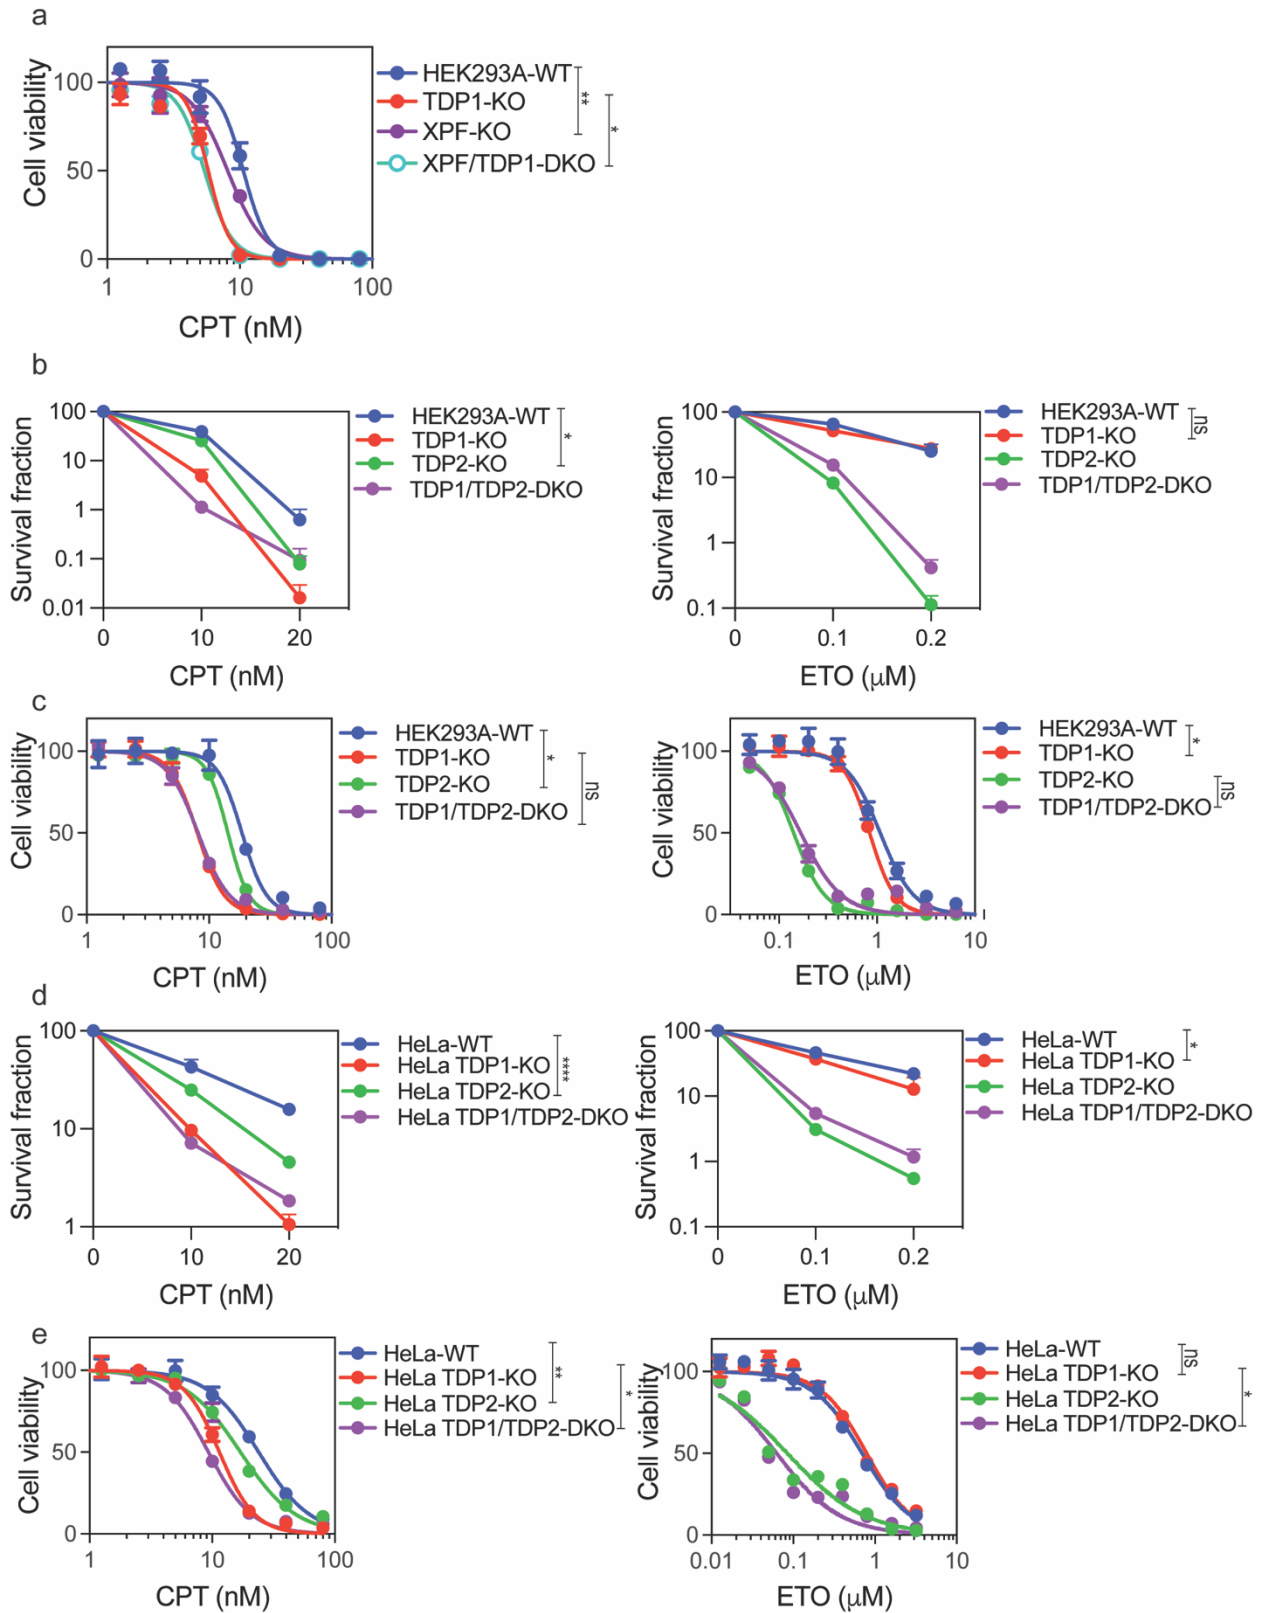

**Supplementary Fig. 6: TDP2-KO cells showed mild cellular sensitivity to CPT and no additive effect with TDP1 deficiency.** **a** The proliferation of indicated cell lines was measured using a CellTiter-Glo assay after 3 days in the presence of the indicated concentrations of CPT. Data are presented as the mean  $\pm$  SD (n = 3 biologically independent experiments). Two-tailed unpaired *t*-test was used for statistical analysis of the IC50 of each cell line. **\*\****p* (HEK293A-WT vs. XPF-KO) = 0.003893, and **\****p* (TDP1-KO vs. XPF/TDP1-DKO) = 0.044978. **b** CPT (left panel) and ETO (right panel) sensitivity of indicated cell lines was detected by colony formation assay. Data are represented as mean  $\pm$  SD. n = 6 biologically independent replicates. Two-tailed unpaired *t* test with Welch's correction was used for statistical analysis of 20 nM CPT or 0.2  $\mu$ M ETO. **\****p* (CPT: HEK293A-WT vs. TDP2-KO) = 0.02007, and ns, not significant. **c** as in **a** but the proliferation of indicated cell lines was measured in the presence of CPT (left panel) or ETO (right panel). Data are presented as the mean  $\pm$  SD (n = 3 biologically independent experiments). Two-tailed unpaired *t*-test was used for statistical analysis. **\****p* (CPT: HEK293A-WT vs. TDP2-KO) = 0.013910, **\****p* (ETO: HEK293A-WT vs. TDP1-KO) = 0.014183, and ns, not significant. **d** as in **b** but indicated HeLa cell lines was examined. Data are represented as mean  $\pm$  SD. n = 6 biologically independent replicates. Two-tailed unpaired *t* test with Welch's correction was used for statistical analysis. **\*\*\*\****p* (CPT: HeLa-WT vs. HeLa TDP2-KO) = 0.000003, **\****p* (ETO: HeLa-WT vs. HeLa TDP1-KO) = 0.017941. **e** as in **a** but indicated HeLa cell lines was measured in the presence of CPT (left panel) or ETO (right panel). Data are presented as the mean  $\pm$  SD (n = 3 biologically independent experiments). Two-tailed unpaired *t*-test was used for statistical analysis. **\*\****p* (CPT: HeLa-WT vs. HeLa TDP2-KO) = 0.001558, **\****p* (CPT:

HeLa TDP1-KO vs. HeLa TDP1/TDP2-DKO) = 0.022181, \* $p$  (ETO: HeLa TDP1-KO vs. HeLa TDP1/TDP2-DKO) = 0.018112, and ns, not significant.

### Supplementary Fig. 7

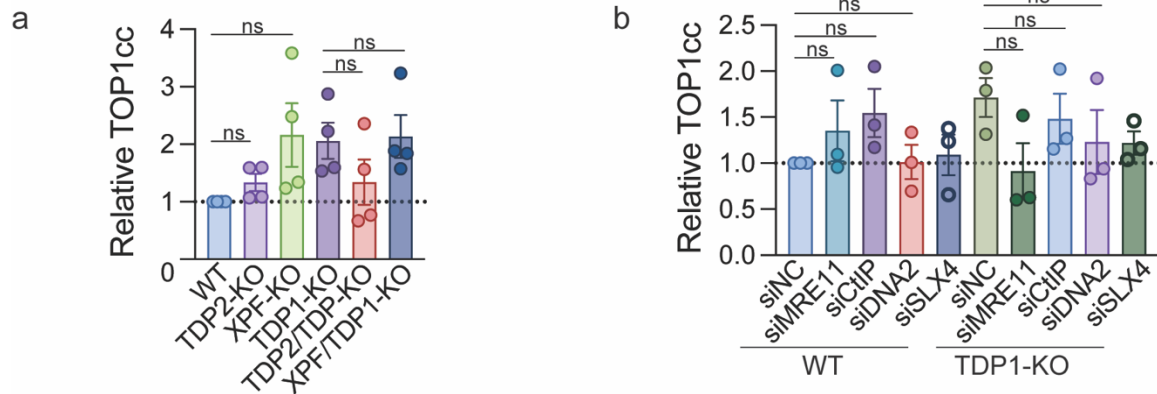

**Supplementary Fig. 7: TOP1cc accumulation was monitored by RADAR assay with deficiency of XPF, TDP2, MRE11, CtIP, DNA2 and SLX4 in WT and TDP1-KO cells.** **a** A RADAR assay was performed after treating the indicated cells with 10  $\mu$ M CPT for 1 h to assess the TOP1cc accumulation. Data are represented as mean  $\pm$  SEM ( $n = 4$  biologically independent experiments). A two-tailed unpaired  $t$  test with Welch's correction was used for statistical analysis. ns, not significant. **b** Control siRNA or siRNA against SLX4, MRE11, CtIP, or DNA2 were transfected into WT or TDP1-KO cells. 72 h after siRNA transfection, a RADAR assay was performed after treating the indicated cells with 10  $\mu$ M CPT for 1 h to assess TOP1cc accumulation. Data are represented as mean  $\pm$  SEM ( $n = 3$  biologically independent experiments). A two-tailed unpaired  $t$  test with Welch's correction was used for statistical analysis. ns, not significant.

### Supplementary Fig. 8

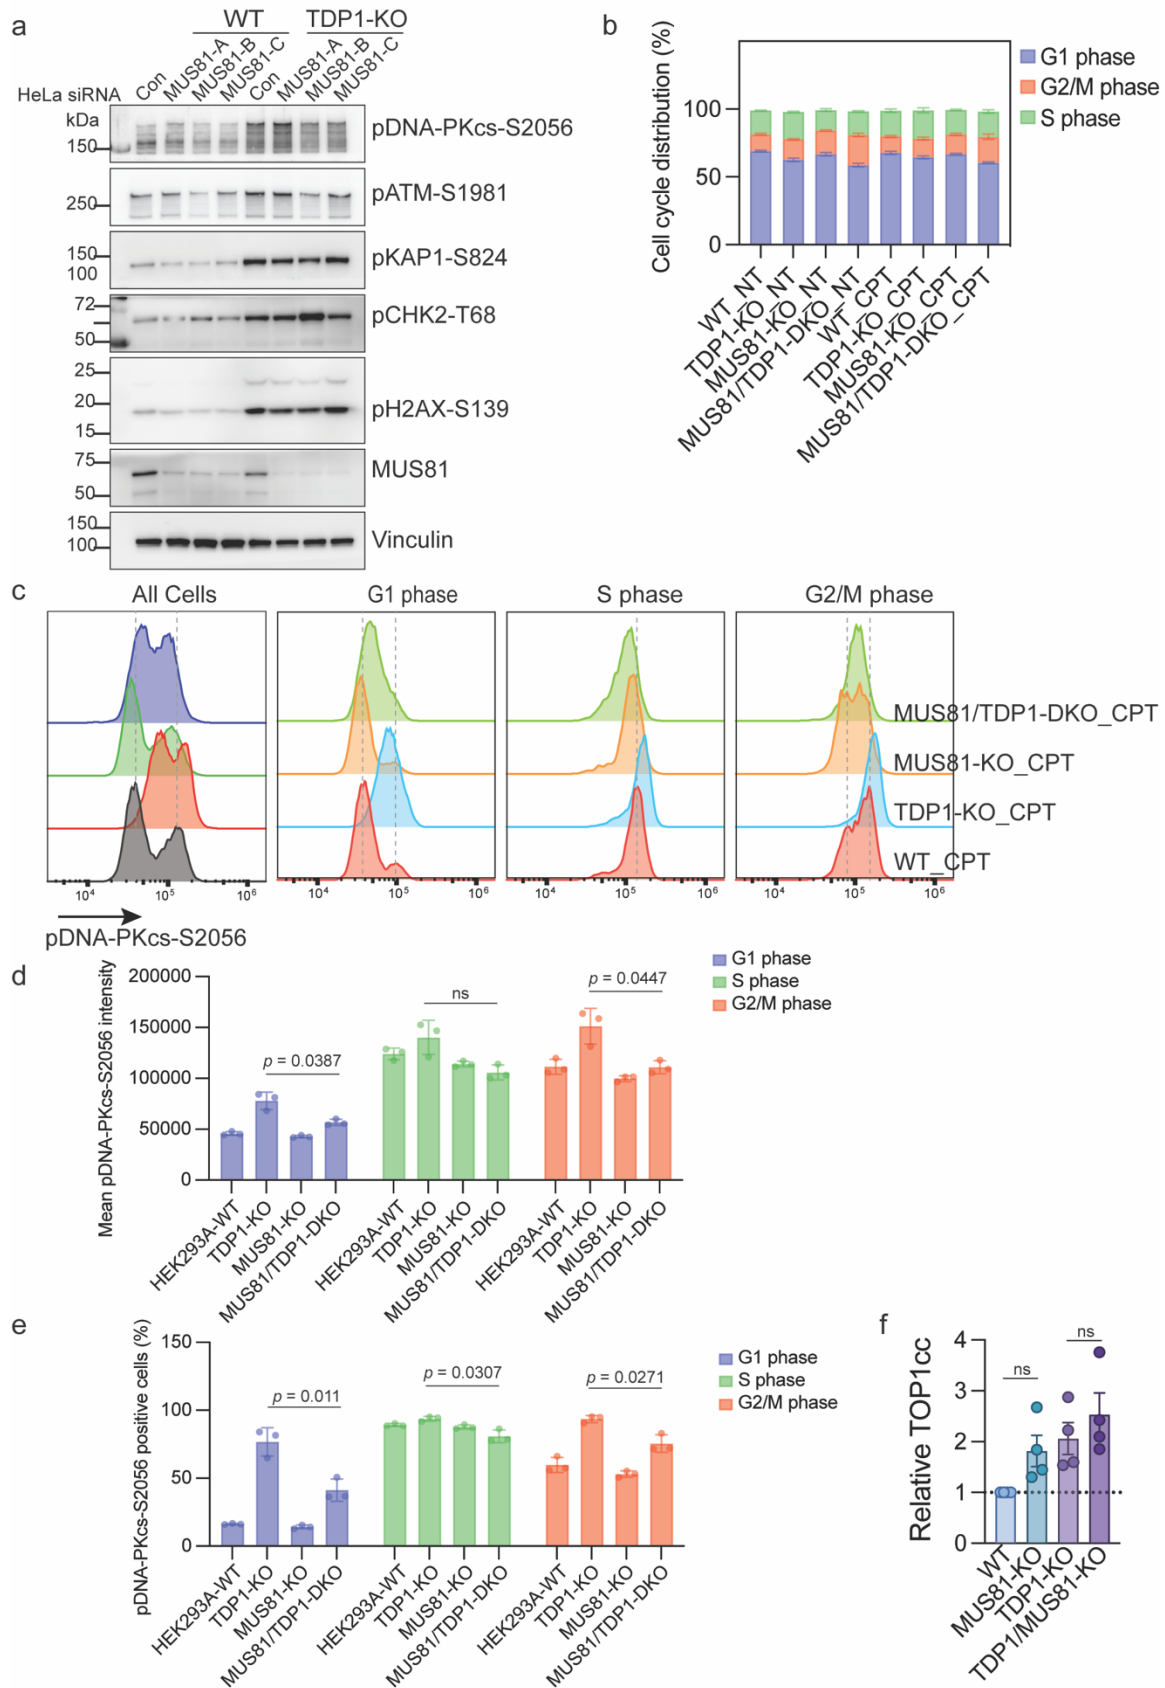



**Supplementary Fig. 8: MUS81 caused a decreased pDNA-PKcs-S2056 signal in all cell cycle phases.** **a** Control siRNA or siRNA against MUS81 (A, B, and C) were transfected into HeLa WT or HeLa TDP1-KO cells. 72 h after siRNA transfection, cells were treated with 10  $\mu$ M CPT for 1 h. Whole-cell extracts were prepared and subjected to Western blotting with the indicated antibodies. Experiments were repeated at least three times, and similar results were obtained. **b** Cell cycle distribution of the flow cytometry analysis of WT, TDP1-KO, MUS81-KO, and MUS81/TDP1-DKO cells either not treated (NT) or treated with 10  $\mu$ M CPT for 1 h. Data are presented as the mean  $\pm$  SD (n = 3 biologically independent experiments). **c** Flow cytometry analysis of pDNA-PKcs-S2056 intensity in WT, TDP1-KO, MUS81-KO, and MUS81/TDP1-DKO cells treated with 10  $\mu$ M CPT for 1 h. Cells from G1, G2/M, or S phase were independently presented. **d** Quantification of **c**. Mean pDNA-PKcs-S2056 intensity from three independent experiments is shown in a bar chart (mean  $\pm$  SD, n = 3 biologically independent experiments). A two-tailed unpaired *t* test with Welch's correction was used for statistical analysis. ns, not significant. **e** Percentage of pDNA-PKcs-S2056-positive cells from three independent experiments was shown in a bar chart (mean  $\pm$  SD, n = 3 biologically independent experiments). A two-tailed unpaired *t* test with Welch's correction was used for statistical analysis. **f** A RADAR assay was performed after treating the indicated cells with 10  $\mu$ M CPT for 1 h to assess TOP1cc accumulation. Data are represented as mean  $\pm$  SEM (n = 4 biologically independent experiments). A two-tailed unpaired *t* test with Welch's correction was used for statistical analysis. ns, not significant.
