# Supplementary material for: TDP1-independent pathways in the process and repair of TOP1-induced DNA damage
Source: PubMed Central journal article supplement (PMC9307636; doi:10.1038/s41467-022-31801-7), 2022-07-22
Supplement: 41467_2022_31801_MOESM2_ESM.pdf [file 41467_2022_31801_MOESM2_ESM.pdf]

### **Description of Additional Supplementary Files**

File Name: Supplementary Data 1

Description: Raw sgRNA counts in the CRISPR screens.

File Name: Supplementary Data 2

Description: Normalized sgRNA counts in the CRISPR screens.

File Name: Supplementary Data 3

Description: Drug Z score ranking of CPT co-essential genes in HEK293A-WT cells.

File Name: Supplementary Data 4

Description: Drug Z score ranking of CPT co-essential genes in TDP1-KO cells.

File Name: Supplementary Data 5

Description: Drug Z score ranking of TDP1 co-essential genes.

File Name: Supplementary Data 6

Description: Drug Z score ranking of TDP1 and CPT combined co-essential genes.

File Name: Supplementary Data 7

Description: KEGG pathway analysis of genes whose loss of function led to CPT sensitivity ( $p < 0.01$ ) in WT and TDP1-KO cells.
